# Supplementary material for: Use multiscale simulation to explore the effects of the homodimerizations between different conformation states on the activation and allosteric pathway for the μ-opioid receptor
Source: Royal Society of Chemistry journal article supplement (doi:10.1039/c8cp02016g), 2018-01-01
Supplement: c8cp02016g1.pdf [file c8cp02016g1.pdf]

**Use multiscale simulation to explore the effect of homo-  
dimerization between different conformation states on the  
activation and allosteric pathway for  $\mu$ -opioid receptor**

Xi Zhang<sup>a</sup>, Yuan Yuan<sup>b</sup>, Longrong Wang<sup>a</sup>, Yanzhi Guo<sup>a</sup>, Menglong Li<sup>a</sup>, Chuan Li<sup>\*c</sup> and Xuemei Pu<sup>\*a</sup>

- a. Faculty of Chemistry, Sichuan University, Chengdu, Sichuan 610064; People's Republic of China.
- b. College of Management, Southwest University for Nationalities, Chengdu 610041, P. R. China
- c. College of Computer Science, Sichuan University, Chengdu, Sichuan 610064, P. R. China
- \* E-mail address: [xmpuscu@scu.edu.cn](mailto:xmpuscu@scu.edu.cn)  
[lcharles@scu.edu.cn](mailto:lcharles@scu.edu.cn)

# Supporting information

**Table S1.** The averaged distances of TM3-TM6 (Å) over the last 10  $\mu$ s trajectories of the 100  $\mu$ s simulations for each parallel MD and their averaged values (labelled as Average) over the three parallel MDs.

|                                | Average | Simulation 1 | Simulation 2 | Simulation 3 |
|--------------------------------|---------|--------------|--------------|--------------|
| Inactive Monomer               | 12.6    | 12.2         | 14.3         | 11.4         |
| Active Monomer                 | 8.3     | 8.1          | 9.8          | 6.9          |
| Protomer A of I-I dimer        | 14.1    | 13.7         | 16.1         | 12.4         |
| Protomer B of I-I dimer        | 6.7     | 6.2          | 8.1          | 5.9          |
| Inactive Protomer of A-I dimer | 11.9    | 11.4         | 13.9         | 10.3         |
| Active Protomer of A-I dimer   | 7.5     | 7.2          | 8.7          | 6.5          |

**Table S2.** The averaged distances of TM5-TM7 (Å) over the last 10  $\mu$ s trajectories of the 100  $\mu$ s simulations for each parallel MD and their averaged values (labelled as Average) over the three parallel MDs.

|                                | Average | Simulation 1 | Simulation 2 | Simulation 3 |
|--------------------------------|---------|--------------|--------------|--------------|
| Inactive Monomer               | 21.3    | 20.8         | 23.8         | 19.3         |
| Active Monomer                 | 21.0    | 20.8         | 23.1         | 19.0         |
| Protomer A of I-I dimer        | 17.1    | 16.4         | 19.5         | 15.3         |
| Protomer B of I-I dimer        | 19.2    | 18.4         | 22.3         | 16.8         |
| Inactive Protomer of A-I dimer | 8.4     | 8.1          | 9.7          | 7.4          |
| Active Protomer of A-I dimer   | 13.4    | 12.7         | 14.1         | 13.5         |

**Table S3.** The averaged distances of TM3-TM7 (Å) over the last 10  $\mu$ s trajectories of the 100  $\mu$ s simulations for each parallel MD and their average values (labelled as Average) over the three parallel MDs.

|                                | Average | Simulation 1 | Simulation 2 | Simulation 3 |
|--------------------------------|---------|--------------|--------------|--------------|
| Inactive Monomer               | 16.2    | 15.9         | 17.7         | 15.1         |
| Active Monomer                 | 14.9    | 14.8         | 16.2         | 13.6         |
| Protomer A of I-I diimer       | 7.9     | 7.5          | 9.8          | 6.3          |
| Protomer B of I-I diimer       | 29.2    | 28.2         | 32.3         | 27.2         |
| Inactive Protomer of A-I dimer | 9.8     | 9.7          | 10.9         | 8.7          |
| Active Protomer of A-I dimer   | 11.8    | 11.7         | 13.1         | 10.6         |

**Table S4.** The  $\Delta$ RMSD values ( $\text{\AA}$ ) over the three parallel MD simulations for three key regions in each receptor unit of the four systems, derived from the last 10  $\mu\text{s}$  equilibrium trajectories of 100  $\mu\text{s}$  simulation <sup>a</sup>.

|                                |         | Simulation 1 | Simulation 2 | Simulation 3 |
|--------------------------------|---------|--------------|--------------|--------------|
| Inactive Monomer               | ECL2    | -0.4         | -1.1         | -0.2         |
|                                | ICL1-H8 | -3.4         | -4.0         | -3.0         |
|                                | NPxxY   | -0.2         | -1.1         | -0.4         |
| Active Monomer                 | ECL2    | -0.1         | -0.2         | -0.3         |
|                                | ICL1-H8 | 1.9          | 1.6          | 1.2          |
|                                | NPxxY   | 0.3          | 0.2          | 0.2          |
| Protomer A of I-I dimer        | ECL2    | -1.0         | -2.3         | -0.5         |
|                                | ICL1-H8 | 0.5          | 0.1          | 0.7          |
|                                | NPxxY   | 0.2          | 0.1          | 0.3          |
| Protomer B of I-I dimer        | ECL2    | -1.4         | -1.9         | -1.1         |
|                                | ICL1-H8 | -2.1         | -2.6         | -1.8         |
|                                | NPxxY   | -1.3         | -1.7         | -1.1         |
| Inactive protomer of A-I dimer | ECL2    | -0.2         | -0.4         | -0.2         |
|                                | ICL1-H8 | -0.2         | -0.5         | -0.3         |
|                                | NPxxY   | 0.9          | 1.2          | 0.8          |
| Active protomer of A-I dimer   | ECL2    | 0.6          | 0.4          | 0.7          |
|                                | ICL1-H8 | 2.6          | 2.1          | 2.5          |
|                                | NPxxY   | 0.9          | 1.0          | 1.2          |

<sup>a</sup>  $\Delta$ RMSD=RMSD<sub>inactive</sub>-RMSD<sub>active</sub>; RMSD<sub>inactive</sub> denote RMSD relative to the active crystal structure; RMSD<sub>active</sub> denote RMSD relative to the inactive crystal structure.

**Table S5.** The high correlated regions with the absolute values of correlation coefficients larger than 0.6 for the receptor in the four systems, derived from the last 100 ns trajectories of the three parallel all-atom MD simulations with 200 ns simulation times.

| System                         | Simulation 1                             | Simulation 2                  | Simulation 3                             |
|--------------------------------|------------------------------------------|-------------------------------|------------------------------------------|
| Inactive Monomer               | TM6-TM7                                  | TM6-TM7<br>TM1-TM7            | TM6-TM7                                  |
| Active Monomer                 | TM5-TM6<br>TM3-TM6<br>TM4-TM5            | TM5-TM6<br>TM3-TM6<br>TM4-TM5 | TM5-TM6<br>TM3-TM6<br>TM4-TM5            |
| Protomer A of I-I dimer        | None                                     | None                          | None                                     |
| Protomer B of I-I dimer        | TM2-TM3<br>TM3-TM4<br>TM2-TM4<br>TM3-TM5 | TM2-TM3<br>TM4-TM5<br>TM3-TM5 | TM2-TM3<br>TM3-TM4<br>TM2-TM4<br>TM3-TM5 |
| Inactive protomer of A-I dimer | None                                     | None                          | None                                     |
| Active protomer of A-I dimer   | TM3-TM5<br>TM1-TM7<br>TM2-TM7            | TM3-TM5<br>TM1-TM7<br>TM2-TM7 | TM3-TM5<br>TM1-TM7<br>TM2-TM7            |

**Table S6.** The highest frequency of the pathway from the ligand-binding pocket to the G-protein binding region for the three parallel MDs.

| System                         | Simulation 1 | Simulation 2 | Simulation 3 |
|--------------------------------|--------------|--------------|--------------|
| Inactive Monomer               | 82.6%        | 70.1%        | 87.9%        |
| Active Monomer                 | 87.4%        | 78.0%        | 73.5%        |
| Protomer A of I-I dimer        | 52.3%        | 41.6%        | 48.1%        |
| Protomer B of I-I dimer        | 51.2%        | 42.6%        | 58.9%        |
| Inactive protomer of A-I dimer | 63.1%        | 58.3%        | 70.1%        |
| Active protomer of A-I dimer   | 60.5%        | 65.8%        | 57.6%        |

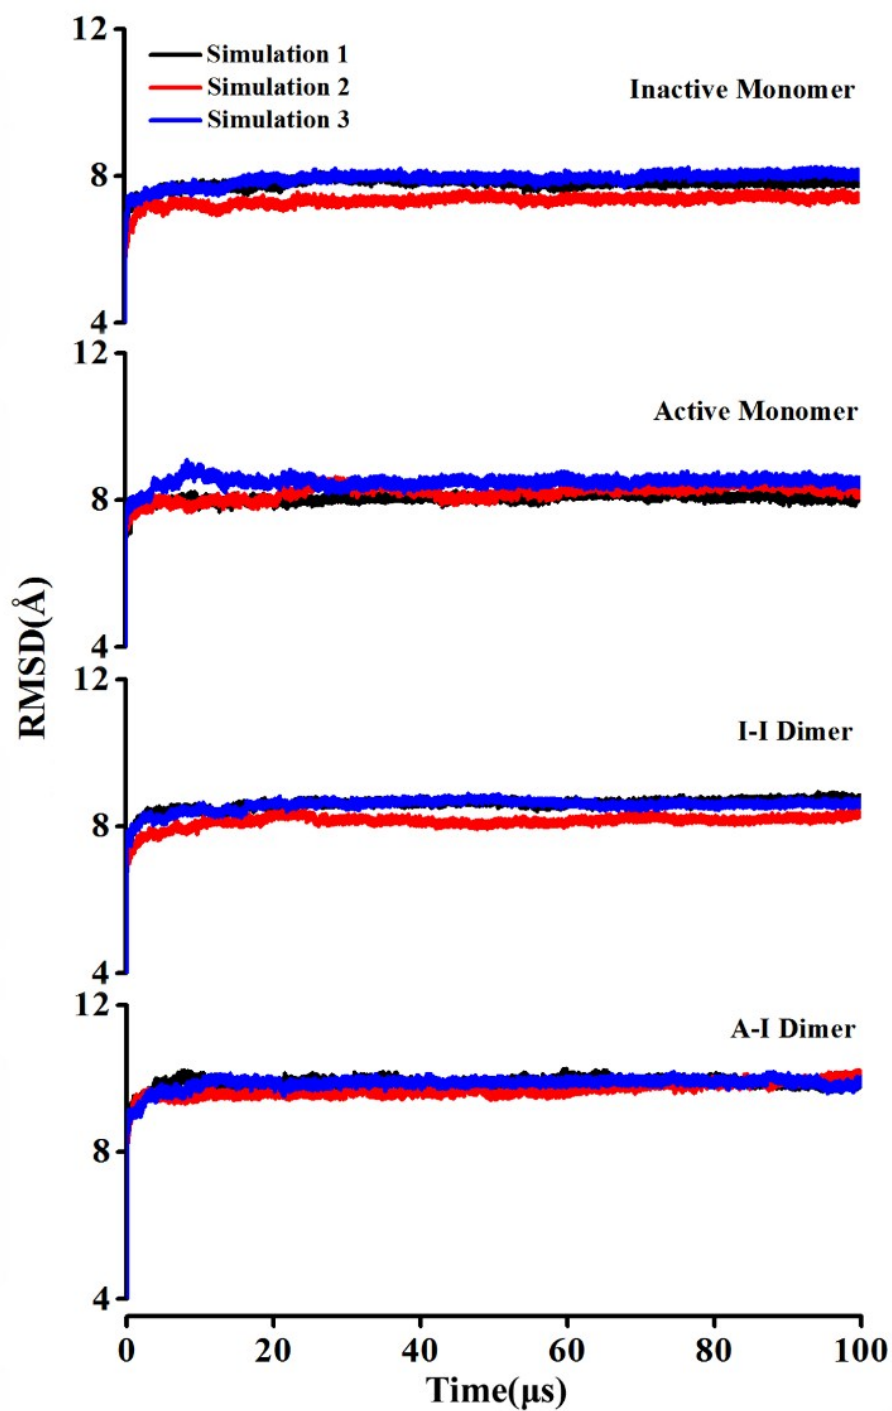

**Figure S1.** The RMSD values of backbone particles of the entire receptor system with respect to their initial structures for three parallel CGMD simulations.



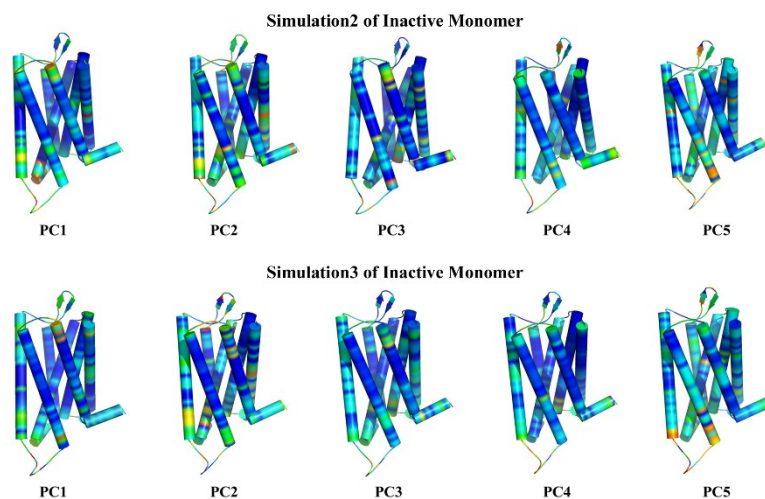

**Figure S2.** The projection of the first five eigenvectors for the other two parallel simulations (*e.g.*, simulation 2 and simulation 3) with the exception of simulation 1 in the text for the inactive monomer. The colours from red to blue correspond to the mobility from large to small.

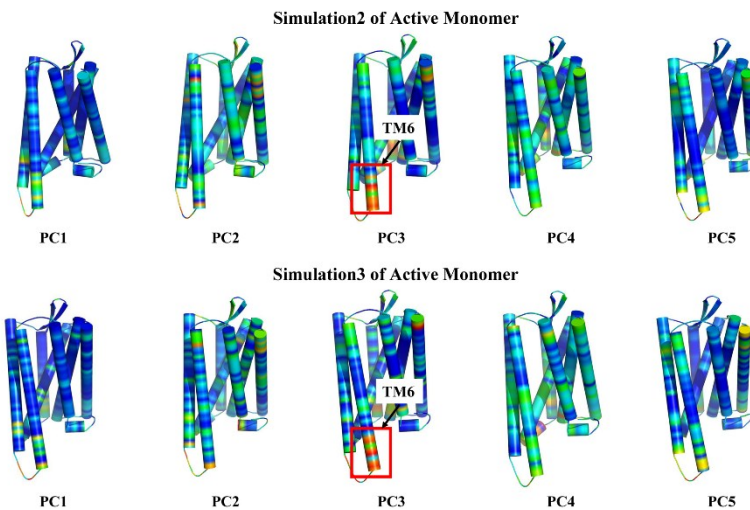

**Figure S3.** The projection of the first five eigenvectors for the other two parallel simulations (*e.g.*, simulation 2 and simulation 3) with the exception of simulation 1 in text for the active monomer. The colours from red to blue correspond to the mobility from large to small.

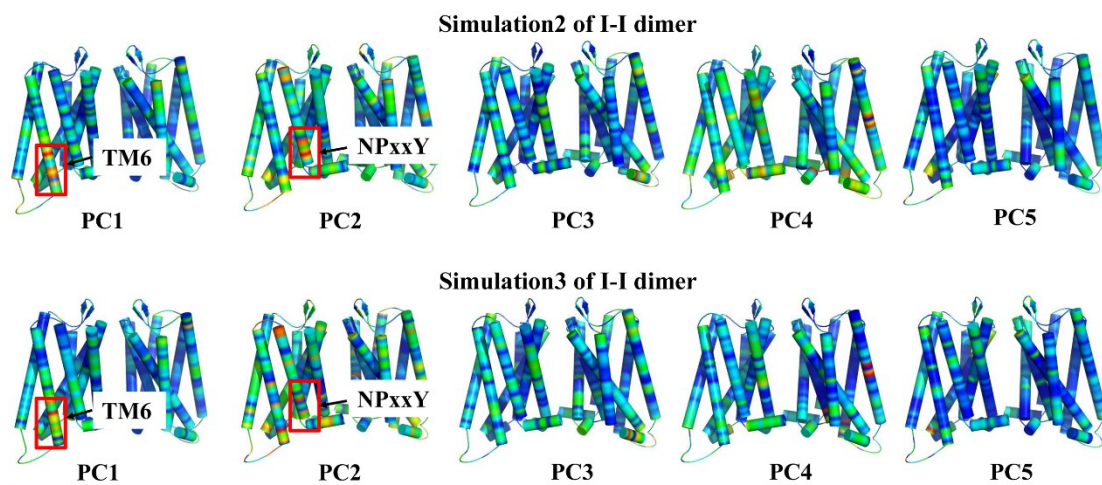

**Figure S4.** The projection of the first five eigenvectors for the other two parallel simulations (*e.g.*, simulation 2 and simulation 3) of the I-I dimer. The colors from red to blue correspond to the mobility from large to small.

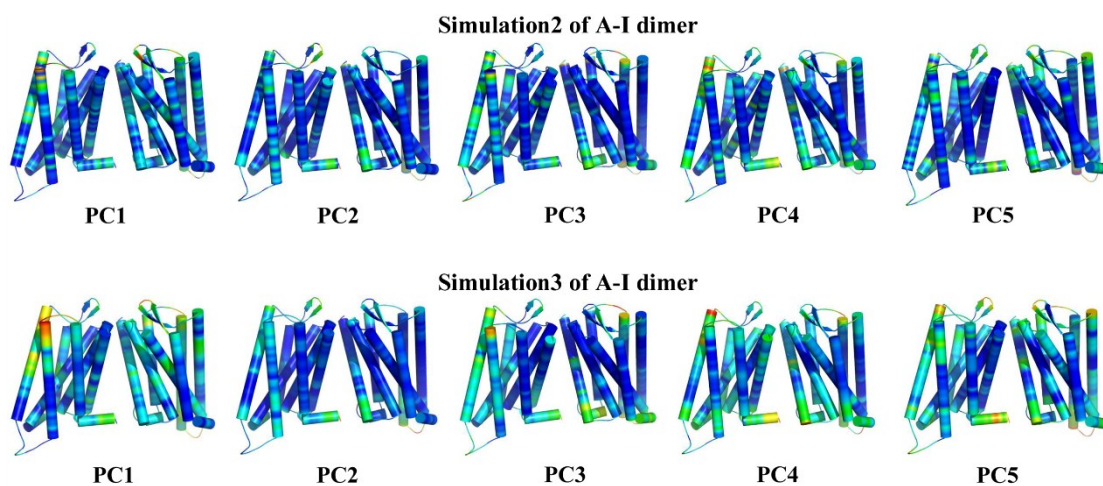

**Figure S5.** The projection of the first five eigenvectors for the other two parallel simulations (*e.g.*, simulation 2 and simulation 3) with the exception of simulation 1 in text for the A-I dimer. The colors from red to blue correspond to the mobility from large to small.
